1 Weight-normative messaging predominates on TikTok – a qualitative content analysis

2

3 Marisa Minadeo<sup>1</sup>¶ and Lizzy Pope<sup>1\*</sup>¶

4

5 <sup>1</sup>Department of Nutrition and Food Sciences, University of Vermont, Burlington, Vermont,  
6 United States of America

7

8 \*Corresponding Author

9 [efpope@uvm.edu](mailto:efpope@uvm.edu)

10

11 ¶ These authors contributed equally to this work.

12

## 13 **Abstract**

14 Tiktok is a social media platform with many adolescent and young adult users. Food, nutrition,  
15 and weight-related posts are popular on TikTok, yet there is little understanding of the content of  
16 these posts, and whether nutrition-related content is presented by experts. The objective was to  
17 identify key themes in food, nutrition, and weight-related posts on TikTok. 1000 TikTok videos  
18 from 10 popular nutrition, food, and weight-related hashtags each with over 1 billion views were  
19 downloaded and analyzed using template analysis. The one-hundred most viewed videos were  
20 downloaded from each of the ten chosen hashtags. Two coders then coded each video for key  
21 themes. Key themes included the glorification of weight loss in many posts, the positioning of  
22 food to achieve health and thinness, and the lack of expert voices providing nutrition  
23 information. The majority of posts presented a weight-normative view of health, with less than  
24 3% coded as weight-inclusive. Most posts were created by white, female adolescents and young  
25 adults. Nutrition-related content on TikTok is largely weight normative, and may contribute to  
26 disordered eating behaviors and body dissatisfaction in the young people that are TikTok's  
27 predominant users. Helping users discern credible nutrition information, and eliminate  
28 triggering content from their social media feeds may be strategies to address the weight-  
29 normative social media content that is so prevalent.

## 30 **Introduction**

31 Social media is incredibly popular with young adults (1), and may be an arena where  
32 young adults are exposed to content that perpetuates diet culture. Diet culture is a system of  
33 beliefs that worships thinness, promotes weight loss as a means of attaining higher status,  
34 demonizes certain ways of eating while encouraging others, and oppresses people who do not

35 match up with the prescribed vision of “health,” most frequently women, trans people, larger-  
36 bodied people, people of color, and people with disabilities (2). Several previous studies  
37 examined the presence of diet-culture content on social media, finding that content perpetuating  
38 the thin ideal and weight normativity is prevalent across various hashtags, #thinspiration,  
39 #fitspiration, #cheatmeal, #weightloss, #quarantine15, and social media sites such as Instagram  
40 and Twitter (3-8).

41 Weight normativity posits that health is only possible at a specific weight, weight and  
42 disease are linearly related, and one has a personal responsibility for meeting weight expectations  
43 (9). Because weight is seen as integral to health, the weight-normative approach focuses on  
44 weight management and achieving a “normal” weight. The ubiquitous nature of diet culture  
45 follows logically from weight normativity as weight management is seen by both as essential to  
46 health. In contrast to weight normativity, the weight-inclusive view of health recognizes that  
47 bodies come in a variety of shapes and sizes, and believes that people in all body sizes can  
48 achieve health if given the opportunity to pursue health behaviors and access to non-stigmatizing  
49 health care (9). Importantly, weight-inclusivity does not define weight control as a health  
50 behavior. As weight-inclusive approaches are associated with improved physical and mental  
51 health outcomes, weight-inclusive messaging may help foster health promoting behaviors.(10-  
52 14).

53 The presentation of diet culture, weight normativity, and the thin ideal on social media is  
54 problematic, as research indicates that social media usage in adolescents and young adults is  
55 associated with disordered eating and negative body image (15-17). Although previous research  
56 has examined the food and weight-related content on several social media platforms quite  
57 thoroughly, the video-sharing app, TikTok, is a new and popular social media platform

58 commonly used by young adults, and little to no research has examined the content of posts on  
59 TikTok. Since the app went worldwide in 2018, it has been downloaded over two billion times  
60 globally (18). The app is like Instagram or Twitter where you can follow and like posts from  
61 certain accounts, but it is unique in several ways. The biggest difference with  
62 this increasingly popular social media site is that the app consists only of short videos created by  
63 its users. The app is very user friendly, providing a wide array of tools for creators to utilize such  
64 as filters, special effects and sounds from popular songs, TV shows, their own voice or other  
65 popular TikToks. TikTok is also notorious for trends; a certain dance, sound, prompt or hashtag  
66 will go viral and other users will then create their own versions. With TikTok, users don't need  
67 to follow certain accounts, or even have their own account, to view posts tailored to them. The  
68 default page on the app is its "for you" page, with endless, algorithmically curated videos based  
69 on content that a user has interacted with or watched previously. Therefore, the TikTok  
70 algorithm literally tailors content "for you." If someone consistently engages with diet, weight  
71 loss, or food content those videos will continue to appear unless the user actively selects a  
72 window labeled "not interested."

73         The potential exposure to endless weight or food-related content becomes more  
74 concerning when considering TikTok's user demographics. Most TikTok users are in Gen-Z  
75 (people born in the mid-1990's to mid-2010's). In July 2020, TikTok reported that one-third of  
76 its 49 million daily users were at or below the age of 14 (19). Although TikTok recently created  
77 censorship policies on eating disorder content, (20, 21) it is possible that the app still contains a  
78 substantial amount of content that reinforces the thin ideal, weight normativity, and diet culture,  
79 and may have the same negative impacts on eating behavior and body image as previous social

80 media sites (16). Conversely, if TikTok posts portray more weight inclusive or body positive  
81 content they could potentially help improve body image and feelings of acceptance (22, 23).

82 Many health professionals may not even know what TikTok is or how to use it, making it  
83 impossible for them to counteract any dangerous messaging young adults may be absorbing on  
84 the app. The purpose of this study was to identify themes present in popular food, weight, and  
85 body-related posts on TikTok. We hypothesized that food, weight, and body-related posts would  
86 be very popular on TikTok, the most evident themes would be weight normative, and young  
87 people would be the most frequent content creators. Determining the themes around food and  
88 weight on TikTok can help health professionals better understand what messages young adults  
89 are seeing around food and weight to better counteract the effects of inaccurate or weight-  
90 normative content.

## 91 **Methods**

### 92 **Video Collection**

93 Hashtags are used on social media to collect content related to a specific topic. On  
94 TikTok, users can add hashtags to the caption of their post with the hash sign (#) prefacing a  
95 word or phrase. When users then click or search certain hashtags or topics, they will be brought  
96 to a feed of videos with that hashtag. In this study, initially, a list of thirty body-image and  
97 eating-related hashtags was collected by searching TikTok for food, nutrition, weight and body  
98 image related content, and noting which hashtags were commonly used by creators and had the  
99 most views. The thirty hashtags were generated both by brainstorming a possible list of food,  
100 weight, and body image-related words based on professional expertise in the nutrition field, as

101 well as using TikTok for multiple weeks noting what hashtags were commonly used on food,  
 102 nutrition, and weight-related posts (see Table 1).

103 **Table 1: Initial list of food/weight/body hashtags**

| Body image hashtag | Number of views | Eating behavior hashtag | Number of views |
|--------------------|-----------------|-------------------------|-----------------|
| #weightloss        | 9.7B            | #health                 | 9.0B            |
| #plussize          | 2.6B            | #healthy                | 5.0B            |
| #weightlossjourney | 2.1B            | #whatieatinaday         | 3.2B            |
| #bodypositivity    | 2.0B            | #diet                   | 3.0B            |
| #fatloss           | 1.6B            | #mealprep               | 2.1B            |
| #weightlosscheck   | 1.3B            | #healthyfood            | 1.2B            |
| #ED                | 641.3M          | #nutrition              | 1.1B            |
| #edrecovery        | 638.4M          | #dieting                | 221.7M          |
| #skinny            | 421.6M          | #nutritiontips          | 185.9M          |
| #weightlosstips    | 365.6M          | #calories               | 201.2M          |
| #bodyshaming       | 264.1M          | #intuitiveeating        | 111.2M          |
| #bodyimage         | 183.2M          | #dietculture            | 60.1M           |
| #skinny            | 146.7M          | #metabolism             | 58.6M           |
| #bodyconfident     | 79.9M           | #antidiet               | 22.5M           |
| #haes              | 15.3M           | #healthymealideas       | 9.0M            |

104 All thirty hashtags had at least 15 million views per hashtag, and the most popular had  
 105 9.7 billion views. From this list of thirty, we eliminated the “health” and “healthy” hashtags  
 106 because we felt they were too broad for the specific focus of the study, as they could include  
 107 content on not smoking, wearing sunscreen, getting sleep, or other health behaviors beyond the  
 108 focus of this study.. The top ten most viewed hashtags from the original list were then chosen to  
 109 be included in this study except for choosing #nutrition with 1.1 billion views versus  
 110 #healthyfood with 1.2 billion views, as it seemed important to analyze the content of videos  
 111 purporting to be about nutrition which could be weight inclusive or perpetuate diet culture (Table

112 2). Since the posts were collected in Fall 2020, #nutrition now has more views that  
113 #healthyfood.

114 **Table 2: Final Selected Hashtag List**

| Hashtag            | Views |
|--------------------|-------|
| #weightloss        | 9.7B  |
| #whatieatinaday    | 3.2B  |
| #diet              | 3.0B  |
| #plussize          | 2.6B  |
| #weightlossjourney | 2.1B  |
| #mealprep          | 2.1B  |
| #bodypositivity    | 2.0B  |
| #fatloss           | 1.6B  |
| #weightlosscheck   | 1.3B  |
| #nutrition         | 1.1B  |

115 Each of the ten hashtags had more than 1.1 billion views per hashtag and we believed  
116 were divided between hashtags that were likely to present weight-normative content  
117 (#weightloss, #diet, #weightlossjourney, #fatloss, #weightlosscheck) or potentially contain  
118 weight-inclusive or weight-neutral content (#whatieatinaday, #plussize, #mealprep,  
119 #bodypositivity, #nutrition). Although the original list of thirty hashtags contained several such  
120 as #intuitiveeating and #haes that may have been most likely to contain weight-inclusive content,  
121 those hashtags had considerably fewer views, 111.2 million and 15.3 million respectively than  
122 any of the top 10 hashtags used in this study which each had at least 1 billion views (see Table  
123 1). These more specific weight-inclusive hashtags were then not selected for analysis because  
124 they did not represent a large share of the food/weight/body posts viewed on TikTok, and would  
125 not give an accurate idea of what the “average” TikTok viewer would find on their for you page,  
126 as the for you page is most likely to display videos with many views. The first 100 videos under

127 each of the ten selected hashtags as well as a screenshot of their first frame and caption were  
128 downloaded in September 2020, and the files were each labeled with the hashtag and record  
129 number. TikToks in each hashtag are displayed from the most views to the least views, so  
130 downloading the first 100 videos in each hashtag meant that the most viewed videos in each  
131 hashtag were collected. Any TikToks that were not downloadable were not included in the  
132 study, as a small percentage of users do not allow their videos to be downloaded. The study was  
133 approved as exempt by the University of Vermont Committee on Human Research in the  
134 Behavioral and Social Sciences, STUDY00001190. As all of the TikTok videos analyzed were  
135 publicly available, informed consent was waived by the ethics committee.

## 136 **Codebook Development**

137 After preliminary analysis of a subset of 100 TikToks (10 from each hashtag), a list of  
138 codes was developed using a template analysis approach that included codes that we expected to  
139 find in the data such as posts that were food related, depicted exercise, reflected someone's  
140 body image, represented weight normativity or weight inclusivity, or discussed weight loss, as  
141 well as codes reflecting themes that emerged from the subset of TikToks (24). Demographic  
142 codes for age, gender presentation, race/ethnicity, and body size were also included in the  
143 codebook, as was a code for noting any professional degrees of the user. After codebook  
144 creation, two coders watched and coded ten videos from each of the hashtags. Codes from each  
145 coder were compared to ensure consistency of code application. Coders then proceeded to code  
146 the remainder of the TikTok videos independently. Once all coding was completed individually,  
147 cross comparisons were run in Excel between the two coders' spreadsheets to identify any  
148 differences in coding. Videos with discrepancies were viewed again by two coders together and  
149 final codes were agreed upon. In total, four coders worked on the project with two coders coding



150 each video. The study authors trained the two additional coders who were nutrition  
151 undergraduate students. When coding discrepancies were noted, the two study authors looked at  
152 each video and determined final coding. All codes used in the codebook except for demographic  
153 codes can be found in the linked supplementary material file.

## 154 **Data Analysis**

155 Demographics were coded for videos in which the creator was visible in the video.  
156 Following the methods used by Lucibello et al., demographic codes were determined based on  
157 the perceived age (teenager, young adult, millennial, middle aged adult or elderly person),  
158 gender presentation (male, female, trans male, trans female, non-binary) and race/ethnicity  
159 (white presenting or non-white presenting) of the person in the video (4). The body size of the  
160 user (average/medium frame, thinner than average frame, and larger than average frame) was  
161 also coded for, in line with methods from previous research (4, 6). Users with health professional  
162 degrees were coded if they explicitly stated their profession in the video or the comments.

163 TikTok content was analyzed using thematic analysis, which allowed us to identify,  
164 analyze, and report key themes from the qualitative TikTok data (25). Code frequencies were  
165 also tabulated using SPSS Software (IBM Corp., Chicago). The frequency data helped identify  
166 how often various codes and resulting themes appeared in each hashtag. The research group  
167 reviewed and refined key themes together, and identified TikToks that were emblematic of each  
168 key theme. The analytic plan was pre-specified, and the hypotheses were determined before data  
169 was collected.

## 170 **Results**

### 171 **User Demographics**

172 Most videos (64.6%) were created by female presenting users, as opposed to male  
173 presenting users (30.6%). When observing race and ethnicity, white presenting individuals were  
174 most represented (56.1%) followed by non-white presenting individuals (32.6%). Additionally,  
175 most of the content collected was created by young users of high school (11.1% of posts) and  
176 college ages (42.4% of posts) versus millennials (28.2%) and middle age (3.3%). Age could not  
177 be determined in 15.2% of posts.

### 178 179 **Body Size, Weight Loss, and Perspective on Weight**

180 Thirty-four percent of TikToks were created by users coded to be of an average/medium  
181 frame, versus only 16.6% of posts showing someone with a larger than average frame. Nearly  
182 44% of all the videos coded in this study had content about weight loss, and 20.4% of all videos  
183 explicitly showed a person's weight transformation in the video. Additionally, less than 3% of all  
184 videos were coded for weight inclusive messaging or content. Physical health or health  
185 behaviors were portrayed in 6.3% of the videos, and mental health or health behaviors were  
186 mentioned or portrayed in 1.6% of videos. Only 2% of the videos explicitly mentioned eating  
187 disorders. Finally, 20.7% of posts were coded for portraying a positive body image whereas 5%  
188 of posts portrayed a negative body image. Weight bias or fat phobia was explicitly combatted in  
189 9.9% of the videos, and clearly perpetuated in 3.1% of the videos, although many other coded  
190 features are inherently weight stigmatizing, like portraying weight loss.

## 191 **Food, Nutrition, and Physical Activity Content**

192           When observing the food content present in the coded videos, 38% of videos explicitly  
193 showed food (cooking, eating, getting take-out etc), and 11.9% of videos featured active  
194 cooking. Culinary instruction was provided in 8.3% of the posts. A significant portion (14.4%)  
195 of all videos mentioned a specific diet or dieting. These included veganism, vegetarianism and  
196 an array of fad diets such as keto and intermittent fasting. Calories were displayed or mentioned  
197 in 5.3% of videos, and 1.4% of videos referenced a health halo. Physical activity was seen in  
198 22.2% of the videos. Almost 11% of all videos contained nutrition advice. Under the hashtag  
199 “nutrition,” 47% of posts provided some sort of nutrition advice. These videos primarily offered  
200 advice about what foods to eat for different purposes, mostly for weight loss. Under the same  
201 hashtag, one quarter of videos also referenced weight loss in addition to providing nutrition  
202 advice. Of all the videos included in the study, 1.4% were created by registered dietitians,  
203 suggesting very little expert nutrition advice on the app. Trainers created 2.1% of the videos,  
204 and doctors 1.1% of the posts.

## 205 **Discussion**

206           Our results indicate that the majority of TikTok content analyzed was created by  
207 teenagers or college students. When considering previous literature on the negative influence of  
208 social media on young people’s body image and eating behaviors, there is reason to be wary of  
209 the impact of the app on its young adult users (26-28). Additionally, young females who create  
210 and engage with weight or food-related content on TikTok are likely to have internalized body  
211 image and disordered eating behaviors from other aspects of their lives (29) making exposure to  
212 weight, food, or body-related content particularly troublesome.

213 When looking at the data, a striking theme was the prevalence of weight-related content  
214 across all ten hashtags. Many of these videos followed the same format and included similar  
215 hashtags, filters, and sounds, speaking to the nature of TikTok and the ability for trends to  
216 become popular. Even, the whatieatinaday hashtag and mealprep hashtags that we believed at  
217 the beginning of the study may be weight-neutral and portray a variety of eating styles and meal  
218 preparations were quite weight normative with users showing how they meal prepped for a  
219 certain diet, or what they ate in a day to lose weight. In fact, the whatieatinaday hashtag has  
220 become so weight normative and triggering that videos using it now carry a trigger warning for  
221 eating disorders including a link to the National Eating Disorder Association’s help line because  
222 so many people were using the hashtag to show how little they ate in a day (21).

223 The glorification of weight loss across many videos, and reoccurring suggestion that if you  
224 just try hard enough you can lose weight too, undoubtedly elevate the key principles of weight  
225 normativity, and reinforce to viewers that weight is an important indicator of health status and  
226 overall self-worth. This danger is increased by the substantial number of views that these  
227 hashtags are receiving. The weight loss hashtag alone had almost 10 billion views at the time the  
228 videos were collected, showing that billions of people are interested enough in losing weight to  
229 engage with the hashtag. The number of views the weight-loss focused hashtags received vastly  
230 outnumbered the number of views more explicitly weight-inclusive hashtags received (see Table  
231 1). In our study, very few videos across all hashtags were coded as depicting weight-inclusive  
232 content suggesting that weight inclusive messaging is not prevalent across some of the most  
233 viewed nutrition, food, and body-related hashtags on TikTok.

234 Among the videos that depicted weight loss transformation, common themes included  
235 exercise routines and diet plans, often with images of routine weigh-ins and clothing “down-

236 sizes.” Many of the videos depicting physical activity were also coded for weight loss,  
237 indicating that physical activity was being portrayed not for its inherent benefits to physical and  
238 mental health (30), but as a means to achieve weight loss. In multiple cases, the creator  
239 mentioned finally becoming “happy” after losing the weight, and how their journey to “better  
240 themselves” was not done yet, exemplifying diet culture’s message that a person’s body size is  
241 indicative of their health and moral status. As discussed earlier, TikTok is unique in that users  
242 can choose from a variety of sounds to add to their videos. Several sounds were found to occur  
243 frequently as part of the weight loss trends and included language that poses weight loss as  
244 paramount. Dialogue, sounding like a pep talk from a coach or a trainer, containing phrases such  
245 as “no excuses,” “get up” and “if you want it bad enough, you’ll do it,” implies that not trying to  
246 lose weight makes you lazy, and inferior to those who are pursuing weight loss. Watching weight  
247 loss videos of this nature, especially if endlessly provided to someone by an algorithm, can be  
248 quite seductive, and may give viewers the idea that intense weight loss transformations are both  
249 attainable and something to strive for – not only for appearance purposes but also for physical  
250 and mental well-being.

251         Perhaps portraying weight loss would be less harmful if long-term weight loss was  
252 generally achievable. However, as Tylka et. al (2014) discussed in their literature review of  
253 weight normativity and weight inclusivity, weight loss interventions almost always fail; only  
254 about 20% of individuals who participate in weight loss interventions maintain the weight loss  
255 after one year, and this percentage decreases by the second year (9). The collection of videos  
256 glorifying weight loss on TikTok represent a moment in time, but do not show the longer-term  
257 effects of weight loss interventions, such as weight-cycling, or repeated dieting and weight loss  
258 attempts over many years. All of these outcomes can result in negative impacts to both mental

259 and physical health (31-33). Furthermore, each time someone questing to lose weight is unable  
260 to keep the weight off, the perception that they must then be lazy or lacking in willpower is  
261 reinforced (34, 35).

262 A large percentage (21%) of total users did portray a positive body image, however very  
263 few posted videos lacking weight-normative undertones. Often creators were positive about their  
264 body image *because* they had lost weight, and rarely were depicting body positivity for a body  
265 that would not be deemed “acceptable” by diet culture. Similarly, while there were videos that  
266 mentioned or showed a person’s weight gain, these videos were the minority of weight-related  
267 content and reinforced diet culture beliefs. Weight-gain content tended to be masked with body  
268 positive hashtags and mentions of “self-love,” but still suggested that weight gain is inherently  
269 negative. Voice-overs and comments in these videos excused their weight gain or reassured  
270 themselves that it was okay to have gained weight. For example, a common caption would be  
271 something like, “I gained 20 pounds, but I still love myself.” Having to state that you still love  
272 yourself when your weight increases suggests exposure to weight bias and fat phobia. Such  
273 weight-related stigmas lead to social issues such as devaluation, discrimination and rejection of  
274 individuals who are overweight or obese (36)

275 A major theme that emerged about the food content in the chosen hashtags was that food  
276 content seemed to be devoid of pleasure or social/cultural influences, and instead was perceived  
277 as a means of pursuing health or wellness. A significant portion (14%) of all videos mentioned  
278 a specific diet or dieting. Repeated examples of fad diets from this subset of TikTok videos were  
279 high-protein or low-calorie diets, liquid “cleanses,” and intermittent fasting. These tended to be  
280 posed as ways to achieve a certain body “goal.” A noticeable number of users also shared videos  
281 of themselves making weight loss or detox teas or drinks, to which they attributed their weight

282 loss. Videos like this are especially harmful to a viewer because often the diet or recipe is paired  
283 with a thin, attractive person, leaving the impression that the drink played a role in attaining the  
284 idealized body type. Another theme among food content was instructional videos of users  
285 showing how to make “healthy” versions of “junk” foods. Assigning good or bad labels to food  
286 brings emotion and morality to eating. These emotions are internalized as we eat, and eating a  
287 food deemed “bad” by diet culture’s standards may lead to negative perceptions of self after  
288 consumption (37). Moralizing food can cause hyper-awareness about food choices, and foster  
289 beliefs that certain foods should be avoided because they will cause weight gain or poor health.  
290 This can lead to development of eating disorders such as Orthorexia Nervosa, an eating disorder  
291 defined as the obsession with “correct” eating and a fixation on foods’ role in our physical health  
292 (37, 38).

293 Of all videos coded under the hashtag “nutrition,” 47% provided some sort of nutrition  
294 advice. These videos primarily offered advice about what foods to eat for different purposes,  
295 mostly for weight loss. Under the same hashtag, one quarter of videos also referenced weight  
296 loss in addition to providing nutrition advice. An example pattern would be users showing their  
297 weight transformation, paired with explaining “what they ate on their journey.” This suggests  
298 again that the purpose of food is to manipulate body size rather than for social or cultural  
299 fulfillment. Another key finding was the lack of professional representation on TikTok. Given  
300 the high percentage of videos that provided nutrition advice to viewers, it is surprising how few  
301 came from a health professional. Of all the videos, 1.4% were created by registered dietitians,  
302 suggesting very little expert nutrition advice on the app. Users without professional knowledge  
303 are sharing nutrition tips that can be inaccurate, and often for the purposes of weight loss. These  
304 types of videos likely spread and encourage harmful dieting interventions to a vulnerable

305 audience. Health professionals should recognize that their young adult clients may be gathering  
306 nutrition information on TikTok, and that much of it is not evidence-based.

307 The results of this research raise questions about how the dissemination of weight-centric  
308 messaging can be countered. Can the influence of TikTok and other social media apps be used to  
309 spread more positive and accurate information about food, health and weight? In September  
310 2020, TikTok released a blog post where the company pledged to focus on safeguarding their  
311 community from harmful content, and stated their goal to support a body-positive environment  
312 for their users (20). While it is significant that the platform has acknowledged the danger of diet  
313 culture content trending on their app, the content used in this study was collected after the initial  
314 changes were made, indicating that the problem is still pressing; even with PSA's and resources,  
315 diet culture remains a viral topic. Recent media trends target quarantine bodies, promoting fad  
316 diets, exercise routines, and diet supplements advertised to help lose the weight gained during  
317 lockdown as we approach a post-pandemic lifestyle (39, 40).

318 Perhaps diet culture can be combatted by the spread of weight-inclusive content, such as  
319 Health at Every Size and Intuitive Eating focused content, which work to celebrate the diversity  
320 of body sizes, and reject weight as a symbol of health and morality. A wide range of literature  
321 has found these weight inclusive models to have many benefits, such as improvement of eating  
322 disorder behaviors, as well as associations with improved physical and mental health outcomes  
323 (10-14, 41, 42). Some research has also found that exposure to body positive content on social  
324 media improves body image for young women (22, 43). Increasing awareness and presence of  
325 these paradigms on social media could help mitigate the negative effects of diet culture messages  
326 on young viewers.



327 The dearth of expert voices on TikTok is difficult to combat, because it is challenging for  
328 experts like Registered Dietitians to garner views by mastering the TikTok algorithm, which  
329 often demands that one's content is appealing to adolescents and young adults. Social media  
330 success can be cultivated by experts but takes concerted creative effort, time investment, and the  
331 right persona. Especially on TikTok, videos go viral in a way that is largely controlled by the  
332 secret algorithm that places videos on users' for you pages. Therefore, although certainly it  
333 would help if more registered dietitians were able to gain attention on TikTok, it may be more  
334 realistic to help adolescents and young adults learn how to discern expert advice from  
335 unqualified advice by working on evidence analysis skills. It may also behoove practitioners to  
336 discuss what type of content young adults they work with are seeing on TikTok and how they  
337 could begin to avoid the weight-normative content on the app if they would like to. Future  
338 research should focus on how health experts can best engage with youth on platforms like  
339 TikTok.

## 340 **Strengths and Limitations**

341 This study is the first to our knowledge to examine nutrition and body-image related  
342 content on TikTok. TikTok's popularity especially among young people makes it an important  
343 driver of cultural trends, and therefore it is imperative to understand the content present on the  
344 app. The study also included a large sample of highly viewed videos, indicating that the themes  
345 identified are representative of the content millions of users are engaging with. Additionally, the  
346 study deliberately coded for weight inclusive content in an effort to better understand if weight  
347 inclusivity is widely represented on a social media site. Previous work on social media has not  
348 specifically examined the presence or absence of weight inclusivity.

349 It is important to note that all videos were coded based on subjective observations by the  
350 four female coders. This means that gathering results such as user demographics (age, race,  
351 gender, body size) was not meant to be definitive, but rather to gather a general understanding of  
352 the people who are creating this type of content based on the available information that could be  
353 observed from the video. While differences in coder opinions were accounted for by having each  
354 video coded by two different coders, and then running cross comparisons, there is no way of  
355 knowing the exact demographics of each user beyond merely our observations. Additionally, not  
356 all TikTok videos were downloadable. A small percentage were skipped over when collecting  
357 the 100 videos from each hashtag because of this, and were not included in the study. Finally,  
358 some of the videos appeared in more than just one of the selected hashtags, so the total 1000  
359 videos that were coded included several duplicates, possibly reducing variety in the data.  
360 However, since the first 100 downloadable videos of each hashtag were chosen, duplicates in this  
361 study exist because they were popular enough to appear in the top viewed videos of more than  
362 one of hashtags, and so their inclusion in the study still provides valuable insights.

## 363 **Conclusions**

364 This analysis found that nearly all the 1,000 TikTok videos collected displayed content  
365 that was notably weight normative. Key themes included glorification of weight loss, the  
366 positioning of food to achieve health and thinness, and the lack of expert voices providing  
367 nutrition and health information. Perhaps the most problematic finding from this study is that  
368 that young people are most frequently engaging with and creating diet culture content. The many  
369 trends associated with weight loss omit lifestyle factors that play into weight and health, and  
370 leave impressionable viewers with the message that weight loss and thinness is achievable and  
371 desirable to all, potentially leading to unhealthy perceptions and behaviors surrounding food,

372 weight and body image (44). Knowing what type of weight, food, and nutrition-related content  
373 is prevalent on TikTok is important so health professionals can better understand what type of  
374 messaging young people are engaged with, and begin to formulate strategies for how to counter  
375 the negative impacts that may arise from frequently viewing weight-normative content.

376

## 377 **Acknowledgements**

378 The authors would like to thank Ellie Blom and Kira Mincar for their help with data analysis,  
379 both Ellie and Kira have given permission to be acknowledged.

380

## 381 **References**

- 382 1. Villanti AC, Johnson AL, Ilakkuvan V, Jacobs MA, Graham AL, Rath JM. Social media  
383 use and access to digital technology in US young adults in 2016. *Journal of medical Internet*  
384 *research*. 2017;19(6):e196.
- 385 2. Harrison C. Christy Harrison [Internet]2018. [cited 2021]. Available from:  
386 <https://christyharrison.com/blog/what-is-diet-culture>.
- 387 3. Jebeile H, Partridge SR, Gow ML, Baur LA, Lister NB. Adolescent Exposure to Weight  
388 Loss Imagery on Instagram: A Content Analysis of “Top” Images. *Childhood Obesity*. 2021.
- 389 4. Lucibello KM, Vani MF, Koulanova A, deJonge ML, Ashdown-Franks G, Sabiston CM.  
390 # quarantine15: A content analysis of Instagram posts during COVID-19. *Body Image*.  
391 2021;38:148-56.
- 392 5. Alberga AS, Withnell SJ, von Ranson KM. Fitspiration and thinspiration: a comparison  
393 across three social networking sites. *Journal of Eating Disorders*. 2018;6(1):39.

- 394 6. Tiggemann M, Zaccardo M. ‘Strong is the new skinny’: A content analysis of#  
395 fitspiration images on Instagram. *Journal of health psychology*. 2018;23(8):1003-11.
- 396 7. Pila E, Mond JM, Griffiths S, Mitchison D, Murray SB. A thematic content analysis of#  
397 cheatmeal images on social media: Characterizing an emerging dietary trend. *International*  
398 *Journal of Eating Disorders*. 2017;50(6):698-706.
- 399 8. Lydecker JA, Cotter EW, Palmberg AA, Simpson C, Kwitowski M, White K, et al. Does  
400 this Tweet make me look fat? A content analysis of weight stigma on Twitter. *Eating and Weight*  
401 *Disorders-Studies on Anorexia, Bulimia and Obesity*. 2016;21(2):229-35.
- 402 9. Tylka TL, Annunziato RA, Burgard D, Daniélsdóttir S, Shuman E, Davis C, et al. The  
403 weight-inclusive versus weight-normative approach to health: Evaluating the evidence for  
404 prioritizing well-being over weight loss. *Journal of obesity*. 2014;2014.
- 405 10. Bégin C, Carbonneau E, Gagnon-Girouard M-P, Mongeau L, Paquette M-C, Turcotte M,  
406 et al. Eating-related and psychological outcomes of health at every size intervention in health and  
407 social services centers across the Province of Quebec. *American Journal of Health Promotion*.  
408 2019;33(2):248-58.
- 409 11. Bruce LJ, Ricciardelli LA. A systematic review of the psychosocial correlates of intuitive  
410 eating among adult women. *Appetite*. 2016;96:454-72.
- 411 12. Hawks S, Madanat H, Hawks J, Harris A. The relationship between intuitive eating and  
412 health indicators among college women. *Journal of Health Education*. 2005;36(6):331-6.
- 413 13. Mensinger JL, Calogero RM, Stranges S, Tylka TL. A weight-neutral versus weight-loss  
414 approach for health promotion in women with high BMI: A randomized-controlled trial.  
415 *Appetite*. 2016;105:364-74.

- 416 14. Van Dyke N, Drinkwater EJ. Review article relationships between intuitive eating and  
417 health indicators: literature review. *Public health nutrition*. 2014;17(8):1757-66.
- 418 15. Wilksch SM, O'Shea A, Ho P, Byrne S, Wade TD. The relationship between social media  
419 use and disordered eating in young adolescents. *International Journal of Eating Disorders*.  
420 2020;53(1):96-106.
- 421 16. Fardouly J, Vartanian LR. Social media and body image concerns: Current research and  
422 future directions. *Current opinion in psychology*. 2016;9:1-5.
- 423 17. Holland G, Tiggemann M. A systematic review of the impact of the use of social  
424 networking sites on body image and disordered eating outcomes. *Body image*. 2016;17:100-10.
- 425 18. Sherman A. TikTok reveals detailed user numbers for the first time. CNBC Available at:  
426 [https://www.cnbc.com/2020/08/24/tiktok-reveals-us-global-user-growth-numbers-for-first-time](https://www.cnbc.com/2020/08/24/tiktok-reveals-us-global-user-growth-numbers-for-first-time.html)  
427 html (accessed 16 December 2020). 2020.
- 428 19. Zhong R, Frenkel S. A Third of TikTok's U.S. Users May Be 14 or Under, Raising  
429 Safety Questions. *New York Times* [Internet]. 2020. Available from:  
430 <https://www.nytimes.com/2020/08/14/technology/tiktok-underage-users-ftc.html>.
- 431 20. Wadhwa T. TikTok Safety [Internet]2020. [cited April 28, 2021]. Available from:  
432 <https://newsroom.tiktok.com/en-us/coming-together-to-support-body-positivity-on-tiktok>.
- 433 21. Wadhwa T. TikTok Safety [Internet]2021. [cited April 28, 2021]. Available from:  
434 <https://newsroom.tiktok.com/en-us/supporting-nedawareness-and-body-inclusivity-on-tiktok>.
- 435 22. Cohen R, Fardouly J, Newton-John T, Slater A. # BoPo on Instagram: An experimental  
436 investigation of the effects of viewing body positive content on young women's mood and body  
437 image. *New Media & Society*. 2019;21(7):1546-64.

- 438 23. Webb JB, Vinoski ER, Bonar AS, Davies AE, Etzel L. Fat is fashionable and fit: A  
439 comparative content analysis of Fatspiration and Health at Every Size® Instagram images. *Body*  
440 *image*. 2017;22:53-64.
- 441 24. Brooks J, McCluskey S, Turley E, King N. The utility of template analysis in qualitative  
442 psychology research. *Qualitative research in psychology*. 2015;12(2):202-22.
- 443 25. Nowell LS, Norris JM, White DE, Moules NJ. Thematic analysis: Striving to meet the  
444 trustworthiness criteria. *International journal of qualitative methods*.  
445 2017;16(1):1609406917733847.
- 446 26. Goodyear VA, Armour KM. Young people's perspectives on and experiences of health-  
447 related social media, apps, and wearable health devices. *Social Sciences*. 2018;7(8):137.
- 448 27. Holmberg C, Berg C, Dahlgren J, Lissner L, Chaplin JE. Health literacy in a complex  
449 digital media landscape: pediatric obesity patients' experiences with online weight, food, and  
450 health information. *Health informatics journal*. 2019;25(4):1343-57.
- 451 28. Tiggemann M, Miller J. The Internet and adolescent girls' weight satisfaction and drive  
452 for thinness. *Sex roles*. 2010;63(1-2):79-90.
- 453 29. Pearl RL, Puhl RM. The distinct effects of internalizing weight bias: An experimental  
454 study. *Body Image*. 2016;17:38-42.
- 455 30. Warburton DER, Bredin SSD. Health benefits of physical activity: a systematic review of  
456 current systematic reviews. *Current Opinion in Cardiology*. 2017;32(5):541-56.
- 457 31. Lissner L, Odell PM, D'Agostino RB, Stokes III J, Kreger BE, Belanger AJ, et al.  
458 Variability of body weight and health outcomes in the Framingham population. *New England*  
459 *Journal of Medicine*. 1991;324(26):1839-44.

- 460 32. Rzehak P, Meisinger C, Woelke G, Brasche S, Strube G, Heinrich J. Weight change,  
461 weight cycling and mortality in the ERFORT Male Cohort Study. *European journal of*  
462 *epidemiology*. 2007;22(10):665-73.
- 463 33. Gaesser GA, Angadi SS. Obesity treatment: Weight loss versus increasing fitness and  
464 physical activity for reducing health risks. *Iscience*. 2021:102995.
- 465 34. Puhl RM, Moss-Racusin CA, Schwartz MB. Internalization of weight bias: implications  
466 for binge eating and emotional well-being. *Obesity*. 2007;15(1):19-23.
- 467 35. Wang SS, Brownell KD, Wadden TA. The influence of the stigma of obesity on  
468 overweight individuals. *International journal of obesity*. 2004;28(10):1333-7.
- 469 36. Kahan S, Puhl RM. The damaging effects of weight bias internalization. *Obesity*.  
470 2017;25(2):280.
- 471 37. Harrison C. *Anti-diet: Reclaim your time, money, well-being, and happiness through*  
472 *intuitive eating*: Hachette UK; 2019.
- 473 38. Koven NS, Abry AW. The clinical basis of orthorexia nervosa: emerging perspectives.  
474 *Neuropsychiatric disease and treatment*. 2015;11:385.
- 475 39. Weiner J. The Weight-Loss Industry is Coming for Our Post-Lockdown Bodies. *New*  
476 *York Times* [Internet]. 2021 June 4, 2021. Available from:  
477 <https://www.nytimes.com/2021/05/05/opinion/culture/dieting-covid-weight-loss.html>.
- 478 40. Sole-Smith V. Post-Pandemic Wardrobe Anxiety Has Nothing to Do with Your Body.  
479 *InStyle* [Internet]. 2021 June 4, 2021. Available from:  
480 <https://www.instyle.com/lifestyle/wardrobe-anxiety-post-pandemic>.

- 481 41. Camilleri GM, Méjean C, Bellisle F, Andreeva VA, Kesse-Guyot E, Hercberg S, et al.  
482 Intuitive eating is inversely associated with body weight status in the general population-based  
483 NutriNet-Santé study. *Obesity*. 2016;24(5):1154-61.
- 484 42. Denny KN, Loth K, Eisenberg ME, Neumark-Sztainer D. Intuitive eating in young  
485 adults. Who is doing it, and how is it related to disordered eating behaviors? *Appetite*.  
486 2013;60:13-9.
- 487 43. Rodgers RF, Paxton SJ, Wertheim EH. #Take idealized bodies out of the picture: A  
488 scoping review of social media content aiming to protect and promote positive body image.  
489 *Body Image*. 2021;38:10-36.
- 490 44. Fardouly J, Pinkus RT, Vartanian LR. The impact of appearance comparisons made  
491 through social media, traditional media, and in person in women's everyday lives. *Body Image*.  
492 2017;20:31-9.

## 493 **Supporting Information**

494 S1 Table. Codebook Definitions and Examples
